# Supplementary material for: Identification of Plant and Soil Characteristics Affecting Stability of Winter Wheat Cultivar in Temperate Climates
Source: MDPI journal article supplement (doi:10.3390/agronomy14040779), 2024-04-10
Supplement: s1 [file s1]

## Supplementary Materials:

**Table S1.** Soil characteristics of study location

| Location               | Longitude and latitude | Reference Bulk Density (g cm <sup>-3</sup> ) | Sand Fraction (%) | Clay Fraction (%) | Soil Nutrient Availability class (scale 5°)† | Available Water Capacity class(scale 5°)† | Soil Organic Carbon Stock (g m <sup>-2</sup> ) | Calcium carbonates (g kg <sup>-1</sup> ) | Cation Exchange Capacity (meq/100 g) | C:N (ratio) | Potassium content (g kg <sup>-1</sup> ) | Nitrogen content (%) | Phosphorus content (g kg <sup>-1</sup> ) | pH in CaCl | ph in H2O |
|------------------------|------------------------|----------------------------------------------|-------------------|-------------------|----------------------------------------------|-------------------------------------------|------------------------------------------------|------------------------------------------|--------------------------------------|-------------|-----------------------------------------|----------------------|------------------------------------------|------------|-----------|
| Bezek                  | 51.11; 23.15           | 1.73                                         | 87                | 4                 | 3                                            | 3                                         | 47.86                                          | 4.89                                     | 14.94                                | 11.19       | 124.94                                  | 1.32                 | 35.38                                    | 5.42       | 6.21      |
| Białogard              | 54.0; 15.59            | 1.41                                         | 37                | 19                | 2                                            | 1                                         | 55.89                                          | 13.37                                    | 10.30                                | 11.70       | 108.89                                  | 1.44                 | 44.81                                    | 5.23       | 5.91      |
| Głubczyce Jelenia Góra | 50.194,1782            | 1.41                                         | 42                | 20                | 1                                            | 5                                         | 126.21                                         | 3.15                                     | 10.41                                | 22.55       | 110.05                                  | 1.56                 | 13.33                                    | 3.19       | 3.93      |
| Kawęczyn               | 50.856, 15.70          | 1.4                                          | 42                | 22                | 1                                            | 5                                         | 70.45                                          | 0.09                                     | 13.19                                | 10.03       | 148.96                                  | 2.23                 | 31.64                                    | 5.48       | 6.20      |
| Kościelna Wieś         | 52.168, 20.34          | 1.62                                         | 80                | 8                 | 1                                            | 1                                         | 46.25                                          | 1.84                                     | 5.85                                 | 10.23       | 52.50                                   | 1.17                 | 40.00                                    | 5.06       | 5.42      |
| Krzyżewo               | 51.48, 18.01           | 1.7                                          | 85                | 5                 | 2                                            | 3                                         | 57.68                                          | 2.47                                     | 3.55                                 | 19.02       | 96.65                                   | 1.04                 | 25.09                                    | 3.79       | 4.54      |
| Lisewo                 | 53.025, 22.75          | 1.4                                          | 32                | 19                | 3                                            | 1                                         | 53.59                                          | 5.38                                     | 6.73                                 | 13.00       | 83.79                                   | 0.93                 | 35.83                                    | 4.87       | 5.59      |
| Pawłowice              | 54.195, 18.52          | 1.25                                         | 23                | 48                | 1                                            | 5                                         | 49.37                                          | 20.14                                    | 15.09                                | 12.71       | 124.34                                  | 1.68                 | 25.16                                    | 5.17       | 5.61      |
| Ruska Wieś             | 50.454, 22.75          | 1.73                                         | 39                | 21                | 3                                            | 1                                         | 53.17                                          | 13.47                                    | 7.82                                 | 12.39       | 134.24                                  | 1.38                 | 40.86                                    | 4.71       | 5.60      |
| Sulejów                | 53.79, 22.20           | 1.32                                         | 35                | 32                | 2                                            | 1                                         | 52.92                                          | 5.27                                     | 34.64                                | 11.40       | 56.75                                   | 2.14                 | 32.80                                    | 5.83       | 6.37      |
| Węgrzce                | 51.351, 19.867         | 1.59                                         | 82                | 10                | 2                                            | 1                                         | 76.22                                          | 2.44                                     | 5.62                                 | 11.83       | 121.99                                  | 1.29                 | 35.60                                    | 4.61       | 5.31      |
|                        | 50.119, 19.082         | 1.4                                          | 41                | 22                | 2                                            | 1                                         | 50.48                                          | 6.36                                     | 9.00                                 | 15.11       | 179.82                                  | 1.44                 | 19.76                                    | 4.10       | 4.86      |

†According to Harmonized World Soil Database.

**Table S2.** Descriptions of study winter wheat cultivars.

| Cultivars    | Resistance (scale 9°)‡ |                       |                |            |                      |                |                           |                     |
|--------------|------------------------|-----------------------|----------------|------------|----------------------|----------------|---------------------------|---------------------|
|              | Winter hardiness       | Resistance to lodging | Powdery mildew | Brown rust | Septoria leaf blight | Chaff septoria | Diseases of the stem base | Fusarium ear blight |
| Admont       | 4.5                    | 8                     | 5              | 2          | 5                    | 5              | 6                         | 5                   |
| Ambicja      | 3.5                    | 8                     | 7.2            | 8.2        | 7.2                  | 7.1            | 7.1                       | 7                   |
| Apostel      | 4                      | 7                     | 7.6            | 7.6        | 6.9                  | 7.2            | 7.2                       | 7.4                 |
| Argument     | 3.5                    | 7.4                   | 8.5            | 8.8        | 7                    | 8.4            | 8                         | 8.5                 |
| Artist       | 4                      | 7                     | 7.7            | 7.1        | 6.5                  | 7.5            | 7.8                       | 7.5                 |
| Bataja       | 4.5                    | 7.4                   | 7.7            | 7.1        | 6.4                  | 7.2            | 7.1                       | 7.9                 |
| Błyskawica   | 4                      | 8.1                   | 7              | 8.1        | 7                    | 7              | 8.1                       | 7                   |
| Bonanza      | 4                      | 7                     | 8.15           | 7.75       | 6.1                  | 6.85           | 8.2                       | 7.45                |
| Bosporus     | 4                      | 7.5                   | 8.9            | 6.8        | 7.4                  | 8.1            | 7.5                       | 7.9                 |
| Comandor     | 4.5                    | 7.4                   | 7.7            | 8          | 6.9                  | 7.8            | 7.5                       | 7.9                 |
| Euforia      | 5.5                    | 8                     | 8.1            | 6          | 6.9                  | 7.6            | 8                         | 7.5                 |
| Formacja     | 4.5                    | 7.8                   | 7.7            | 7.7        | 6.5                  | 7.7            | 7.5                       | 7.8                 |
| Hybery F1    | 3.5                    | 5                     | 4              | 5          | 5                    | 5              | 6                         | 5                   |
| Impresja     | 5                      | 7.7                   | 7.9            | 7.5        | 7.2                  | 7.8            | 8.4                       | 7.8                 |
| Kariatyda    | 4.5                    | 7.5                   | 7.8            | 7.3        | 6.8                  | 7.4            | 7.5                       | 7.6                 |
| Kometa       | 3                      | 6.8                   | 7              | 7          | 7                    | 7              | 7                         | 7                   |
| KWS Donovan  | 3                      | 6.7                   | 4              | 3          | 5                    | 5              | 5                         | 5                   |
| KWS Firebird | 4                      | 6                     | 5              | 5          | 5                    | 5              | 5                         | 5                   |
| KWS Spencer  | 3.5                    | 5                     | 5              | 5          | 5                    | 5              | 5                         | 5                   |
| KWS Talium   | 4.5                    | 7                     | 5              | 5          | 5                    | 4              | 5                         | 5                   |
| KWS          |                        |                       |                |            |                      |                |                           |                     |
| Universum    | 3                      | 7                     | 5              | 5          | 5                    | 5              | 5                         | 5                   |
| LG Jutta     | 5.5                    | 7                     | 8.4            | 8.2        | 7.2                  | 7.5            | 7.4                       | 8.2                 |
| LG Keramik   | 4                      | 6                     | 7.5            | 7.7        | 6.9                  | 7.4            | 7.6                       | 7.1                 |
| Lindbergh    | 2.5                    | 6                     | 8              | 8          | 7                    | 7              | 7                         | 5                   |
| Lokata       | 5.5                    | 7                     | 6              | 6          | 6                    | 6              | 6                         | 6                   |
| Medalistka   | 5.5                    | 6.9                   | 4              | 5          | 4                    | 5              | 5                         | 5                   |
| MHR          |                        |                       |                |            |                      |                |                           |                     |
| Promienna    | 4                      | 7                     | 7              | 7          | 7                    | 7              | 7                         | 7                   |
| Moschus      | 4                      | 8.5                   | 9              | 8          | 8                    | 8              | 6                         | 8                   |
| Nordkap      | 4                      | 6                     | 5              | 5          | 5                    | 5              | 5                         | 5                   |
| Opcja        | 4                      | 6                     | 5              | 5          | 5                    | 5              | 5                         | 5                   |
| Opoka        | 4.5                    | 7                     | 8              | 7          | 7                    | 8              | 9                         | 7                   |
| Owacja       | 4.5                    | 6.7                   | 8.1            | 8.1        | 7.4                  | 7.7            | 8.2                       | 8.2                 |

|                |     |     |     |     |     |     |     |     |
|----------------|-----|-----|-----|-----|-----|-----|-----|-----|
| Patras         | 4   | 7   | 8   | 8   | 8   | 8   | 8   | 8   |
| Plejada        | 5   | 7.6 | 6   | 6   | 5   | 6   | 5   | 6   |
| Reduta         | 4.5 | 8   | 7.1 | 7.2 | 6.7 | 7.3 | 7.8 | 8   |
| RGT Bilanz     | 4.5 | 8   | 8   | 7.5 | 7.5 | 7.5 | 8.5 | 7.5 |
| RGT            |     |     |     |     |     |     |     |     |
| Kilimanjaro    | 4.5 | 8   | 8   | 7.5 | 7.5 | 7.5 | 8.5 | 7.5 |
| RGT            |     |     |     |     |     |     |     |     |
| Metronom       | 4.5 | 9   | 8.5 | 7   | 7.5 | 7.5 | 8   | 7.5 |
| RGT Provision  | 4   | 8   | 8.5 | 7   | 6.5 | 7.5 | 7.5 | 7.5 |
| RGT Ritter     | 3   | 8.5 | 7.5 | 7.5 | 8.5 | 7.5 | 7.5 | 7.5 |
| RGT Specialist | 4   | 8   | 8.5 | 8   | 6.5 | 8   | 8.5 | 9   |
| Rivero         | 3.5 | 8   | 8.1 | 7.9 | 7.3 | 7.4 | 7.4 | 7.6 |
| Sfera          | 4   | 7.2 | 8.1 | 7.5 | 6.9 | 7.2 | 7.9 | 7.1 |
| SU Mangold     | 3.5 | 8.4 | 7.7 | 6.5 | 7.4 | 8.2 | 8   | 7.8 |
| SU Petronia    | 4   | 6   | 5   | 5   | 5   | 5   | 5   | 5   |
| SU Tarroca     | 2.5 | 7.9 | 7.1 | 6.9 | 7.1 | 7.9 | 7.2 | 7.8 |
| SU Viedma      | 4   | 6   | 5   | 5   | 5   | 5   | 5   | 5   |
| SY Cellist     | 3   | 6   | 5   | 5   | 5   | 5   | 5   | 5   |
| SY Dubaj       | 4.5 | 6   | 8   | 8   | 7   | 7.6 | 8   | 7.4 |
| SY Orofino     | 4   | 6   | 8.1 | 8.6 | 7.7 | 8   | 8.1 | 7.9 |
| SY Yukon       | 5   | 8.1 | 8.2 | 8.2 | 8   | 7.8 | 8   | 8   |
| Symetria       | 4   | 6.6 | 6   | 6   | 6   | 4   | 4   | 4   |
| Titanus        | 4   | 6   | 5   | 5   | 5   | 5   | 5   | 5   |
| Tytanika       | 5   | 4   | 7   | 8.1 | 6   | 7.7 | 7.7 | 7.7 |
| Venecja        | 4   | 7.6 | 7.6 | 7.1 | 5.9 | 7.6 | 8.1 | 6.5 |

‡ 9° scale 1-worst condition, 9-best condition.
